# Supplementary material for: Synergy of Nitric Oxide and 1-Methylcyclopropene Treatment in Prolong Ripening and Senescence of Peach Fruit
Source: MDPI journal article supplement (doi:10.3390/foods10122956), 2021-12-01
Supplement: s1 [file s1]

**Table S1:** Primers used for quantification of mRNA levels by qRT-PCR

| Gene  | Gene accession | Forward*                 | Reverse*                 |
|-------|----------------|--------------------------|--------------------------|
| SOD   | Ppa010748m     | CTCACTCAAGTCCAGCAACGCA   | GAGAAGGTTTGAAAGCCACGGG   |
| PAL   | Ppa002328m     | TTGGCTCTGGTTTGGCTTCTAT   | TCTGTCTTGCTTAGGCTTCTGA   |
| POD   | Ppa010426m     | GAAGTTTCCGATTCTCTCATAC   | TGGTGGCGGTTCTTGTTTGT     |
| POD-1 | Ppa010431m     | CTCGTATTTCACGGTGCTCCTG   | CGGAAGACAGGGTCAGACAGAA   |
| CAT   | Ppa004763m     | GGCTTATCTCTGCTCTCTCACC   | ACGCTCTGGGATTCGTTCTCTA   |
| APX   | Ppa010673m     | TTGTGCTCTACTCGTGCCACTCCA | CTTGTA CTCTCGCTCACGGTAGG |
| TEF2  | Ppa001367m     | GGTGTGACGATGAAGAGTGATG   | TGAAGGAGAGGGAAGGTGAAAG   |

\*Primers are indicated in the 5'→3' direction
